# Supplementary material for: Curing temperature reduction and performance improvement of solution-processable hole-transporting materials for phosphorescent OLEDs by manipulation of cross-linking functionalities and core structures
Source: Royal Society of Chemistry journal article supplement (doi:10.1039/c6ra01966h), 2016-01-01

## *Supplementary Information for*

# Curing Temperature Reduction and Performance Improvement of Solution-Processable Hole-Transporting Materials for Phosphorescent OLEDs by Manipulation of Cross-Linking Functionalities and Core Structures

*Shahid Ameen,<sup>‡abc</sup> Jaemin Lee,<sup>‡ab</sup> Hyun Han,<sup>a</sup> Min Chul Suh,<sup>\*d</sup> and Changjin Lee<sup>\*ab</sup>*

<sup>a</sup> Advanced Materials Division, Korea Research Institute of Chemical Technology, Daejeon 305-600, Republic of Korea

<sup>b</sup> University of Science & Technology (UST), Daejeon 305-333, Republic of Korea

<sup>c</sup> Department of Chemistry, Kohat University of Science and Technology (KUST), Kohat 26000, Pakistan

<sup>d</sup> Department of Information Display, Kyung Hee University, Dongdaemun-gu, Seoul, 130-701, Republic of Korea

<sup>‡</sup> These authors contributed equally.

<sup>\*</sup> Corresponding author : Prof. Min Chul Suh (E-mail : mcsuh@khu.ac.kr)

<sup>\*</sup> Corresponding author : Dr. Changjin Lee (E-mail : cjlee@kriect.re.kr)

## List of Figures

**Fig. S1** (a)  $^1\text{H}$  NMR, (b)  $^{13}\text{C}$  NMR and (c) FAB-MS spectra of **BCzMS**.

**Fig. S2** (a)  $^1\text{H}$  NMR, (b)  $^{13}\text{C}$  NMR and (c) FAB-MS spectra of **BCzBOS**.

**Fig. S3** (a)  $^1\text{H}$  NMR, (b)  $^{13}\text{C}$  NMR and (c) FAB-MS spectra of **MeO-BCzBOS**.

**Fig. S4** Molecular surfaces of (a) **BCzMS**, (b) **BCzBOS** and (c) **MeO-BCzBOS** by DFT calculation.

**Fig. S5** Second heating scans of the cross-linkable HTL materials **BCzMS**, **BCzBOS** and **MeO-BCzBOS**.

**Fig. S6** UV-Vis. absorption spectra of thermally cross-linked **BCzMS** films before and after solvent rinsing with different thermal curing temperatures.

**Fig. S7** UV-Vis. absorption spectra of thermally cross-linked **BCzBOS** films before and after solvent rinsing, with different thermal curing temperatures.

**Fig. S8** UV-Vis. absorption spectra of thermally cross-linked **MeO-BCzBOS** films before and after solvent rinsing, with different thermal curing temperatures.

**Fig. S9** Electroluminescence spectra of the HTL-containing OLED devices.

**Fig. S10** Luminance-Voltage characteristics of OLEDs by changing the thermal curing temperatures of (a) **BCzBOS** and (b) **BCzMS**.

**Fig. S11** Optical microscope images of the (a) **BCzBOS** and (b) **MeO-BCzBOS** HTL films.

**Fig. S12** AFM analysis results of the HTL films.

**Fig. S13** External quantum efficiency graph of the HTL-containing OLED devices.

**Fig. S14** Energy levels diagram for the devices.



(c)

[ Mass Spectrum ]  
Data : 3-8-003 Date : 08-Mar-2016 10:29  
Sample: MS  
Note : NDR  
Inlet : Direct Ion Mode : FRR+  
Spectrum Type : Normal Ion (MF-Linear)  
RT : 0.17 min Scan# : 2  
BP : m/z 154.0000 Int. : 302.00  
Output m/z range : 100.0000 to 852.9574 Cut Level : 0.70 %

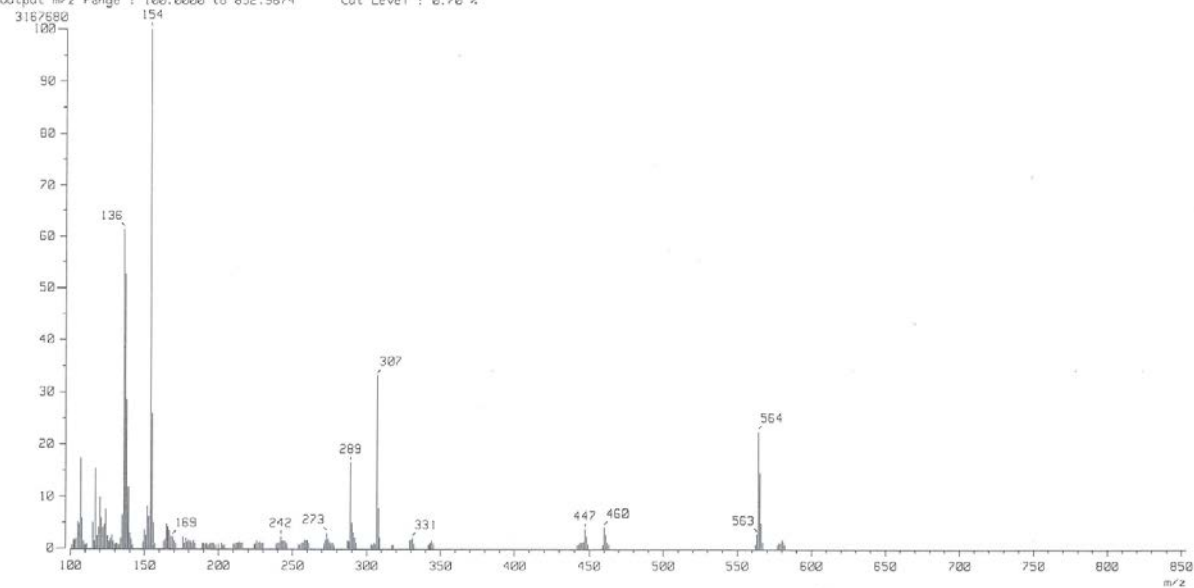

Fig. S2 (a)  $^1\text{H}$  NMR, (b)  $^{13}\text{C}$  NMR and (c) FAB-MS spectra of BCzBOS.

(a)

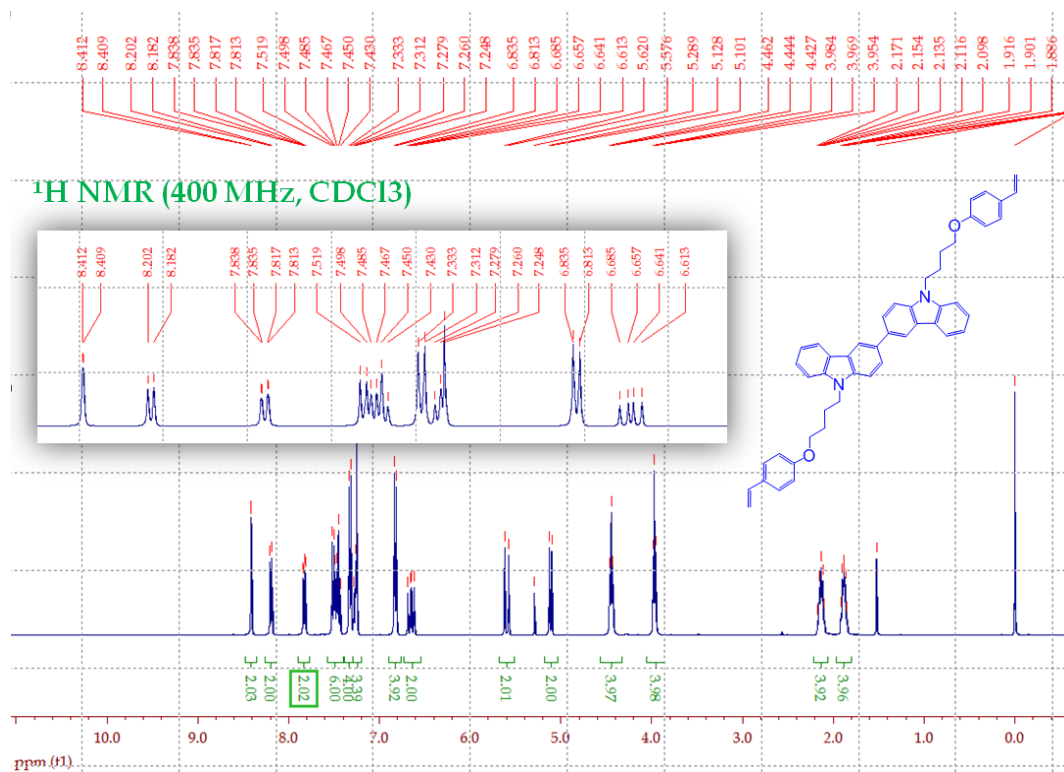

(b)

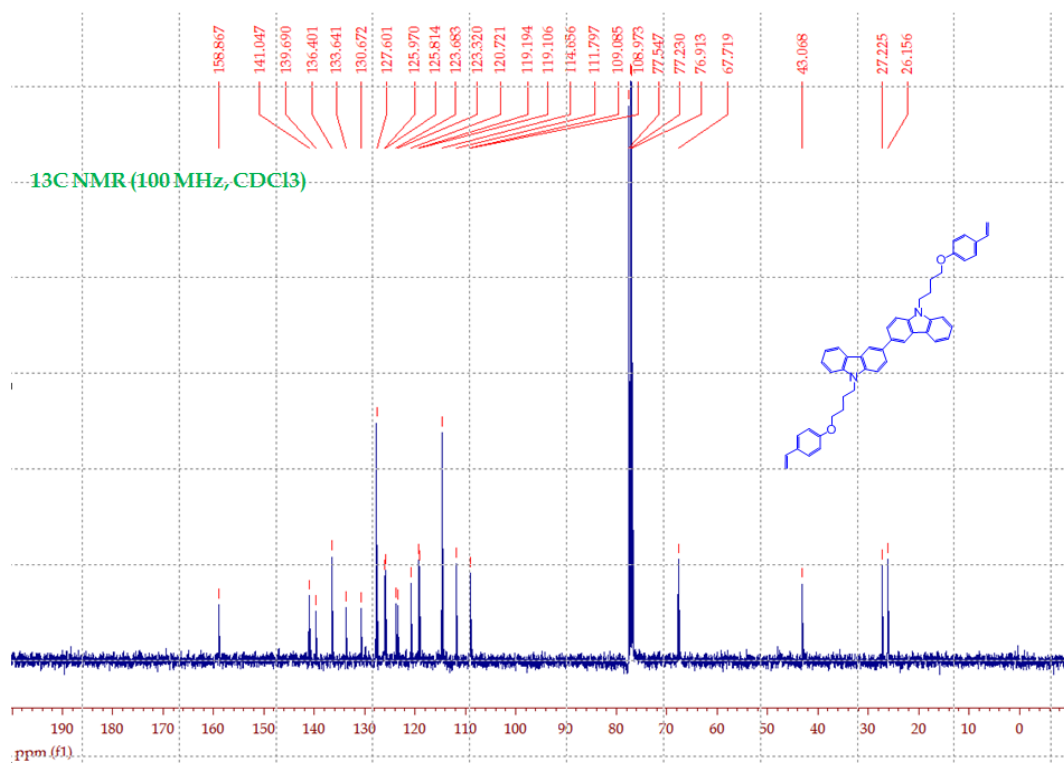

(c)

[ Mass Spectrum ]  
Data : 3-8-003 Date : 08-Mar-2016 10:29  
Sample: MS  
Note : NDR  
Inlet : Direct Ion Mode : FRR+  
Spectrum Type : Normal Ion (MF-Linear)  
RT : 0.17 min Scan# : 2  
BP : m/z 154.0000 Int. : 302.00  
Output m/z range : 100.0000 to 852.9574 Cut Level : 0.70 %



Fig. S3 (a)  $^1\text{H}$  NMR, (b)  $^{13}\text{C}$  NMR and (c) FAB-MS spectra of MeO-BCzBOS.

(a)

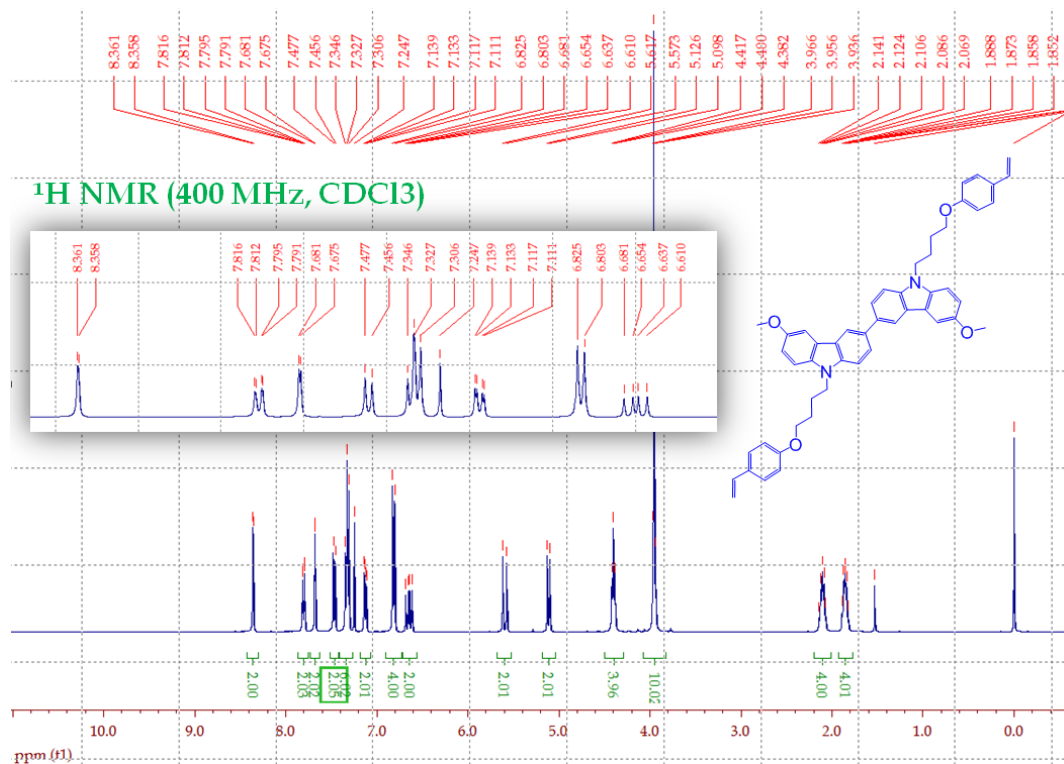

(b)

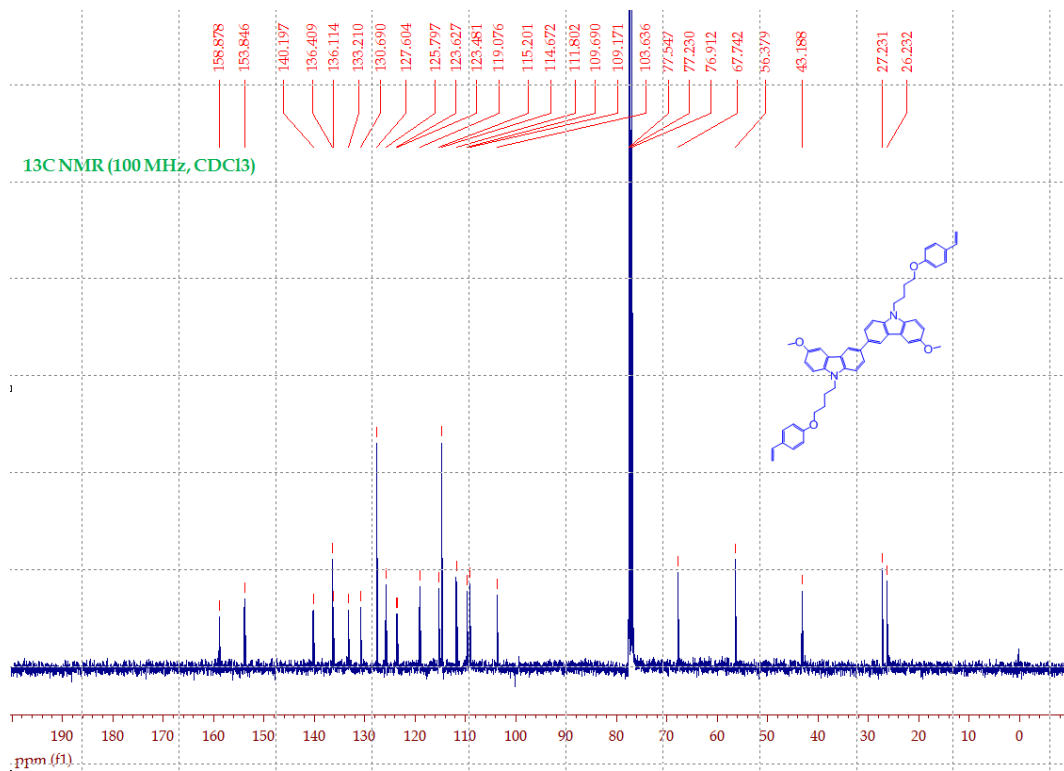

(c)

[ Mass Spectrum ]  
Data : 3-8-003 Date : 08-Mar-2016 10:29  
Sample: MS  
Note : NDR  
Inlet : Direct Ion Mode : FRR+  
Spectrum Type : Normal Ion (MF-Linear)  
RT : 0.17 min Scan# : 2  
BP : m/z 154.0000 Int. : 302.00  
Output m/z range : 100.0000 to 852.9574 Cut Level : 0.70 %





**Fig. S4** Molecular surfaces of (a) **BCzMS**, (b) **BCzBOS** and (c) **MeO-BCzBOS** by DFT calculation.

(a)

LUMO  
(-1.25 eV)

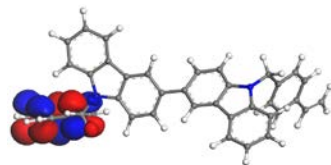

HOMO  
(-5.19 eV)

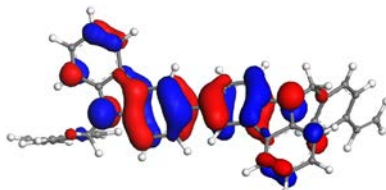

(b)

LUMO  
(-0.99 eV)

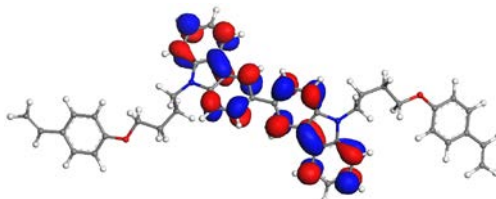

HOMO  
(-5.28 eV)

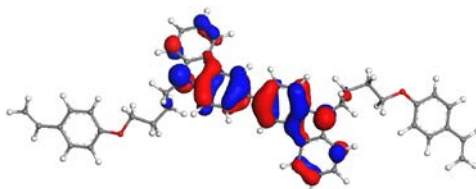

(c)

LUMO  
(-1.03 eV)

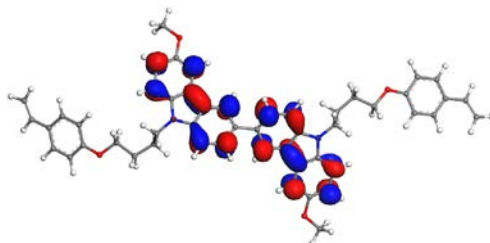

HOMO  
(-4.96 eV)

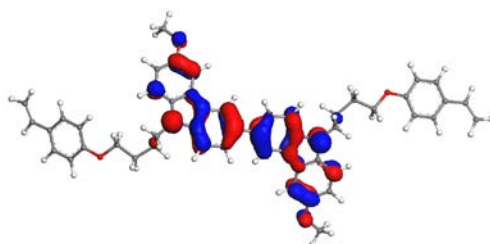

Fig. S5 Second heating scans of the cross-linkable HTL materials **BCzMS**, **BCzBOS** and **MeO-BCzBOS**

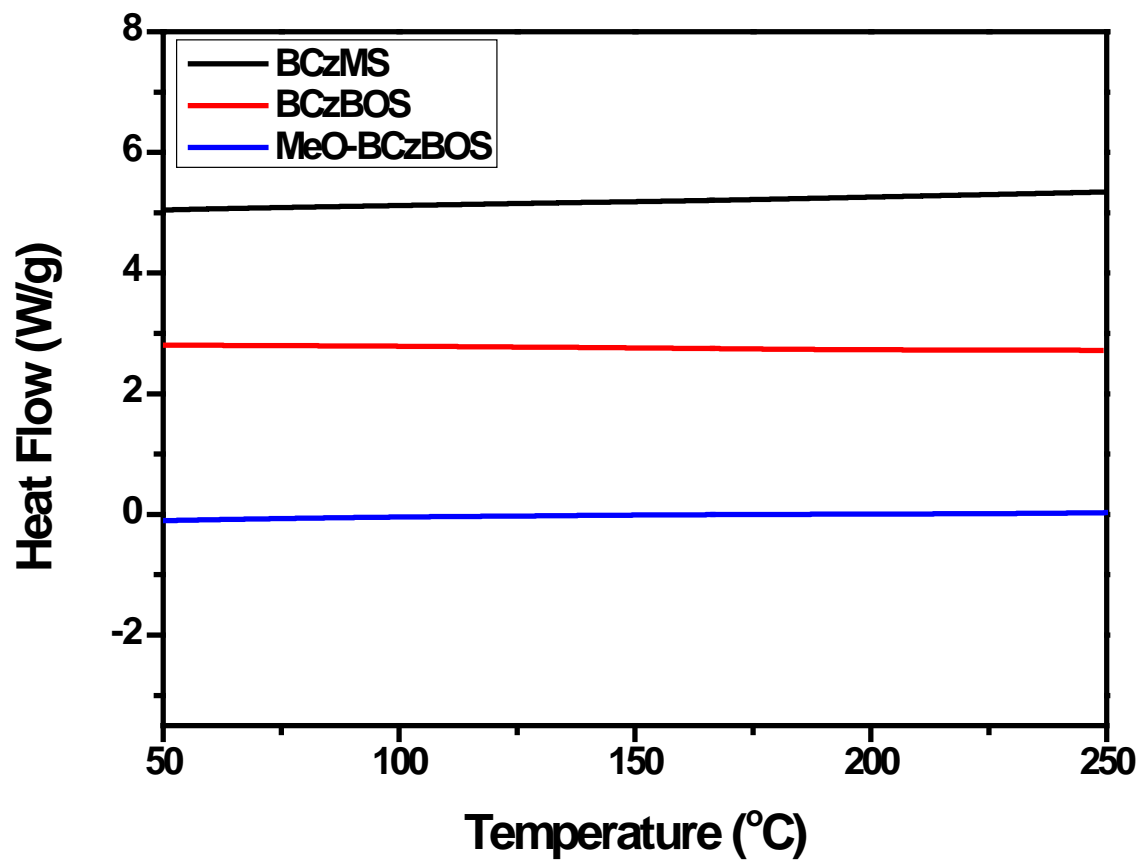

**Fig. S6** UV-Vis. absorption spectra of thermally cross-linked **BCzMS** films before and after solvent rinsing with different thermal curing temperatures.

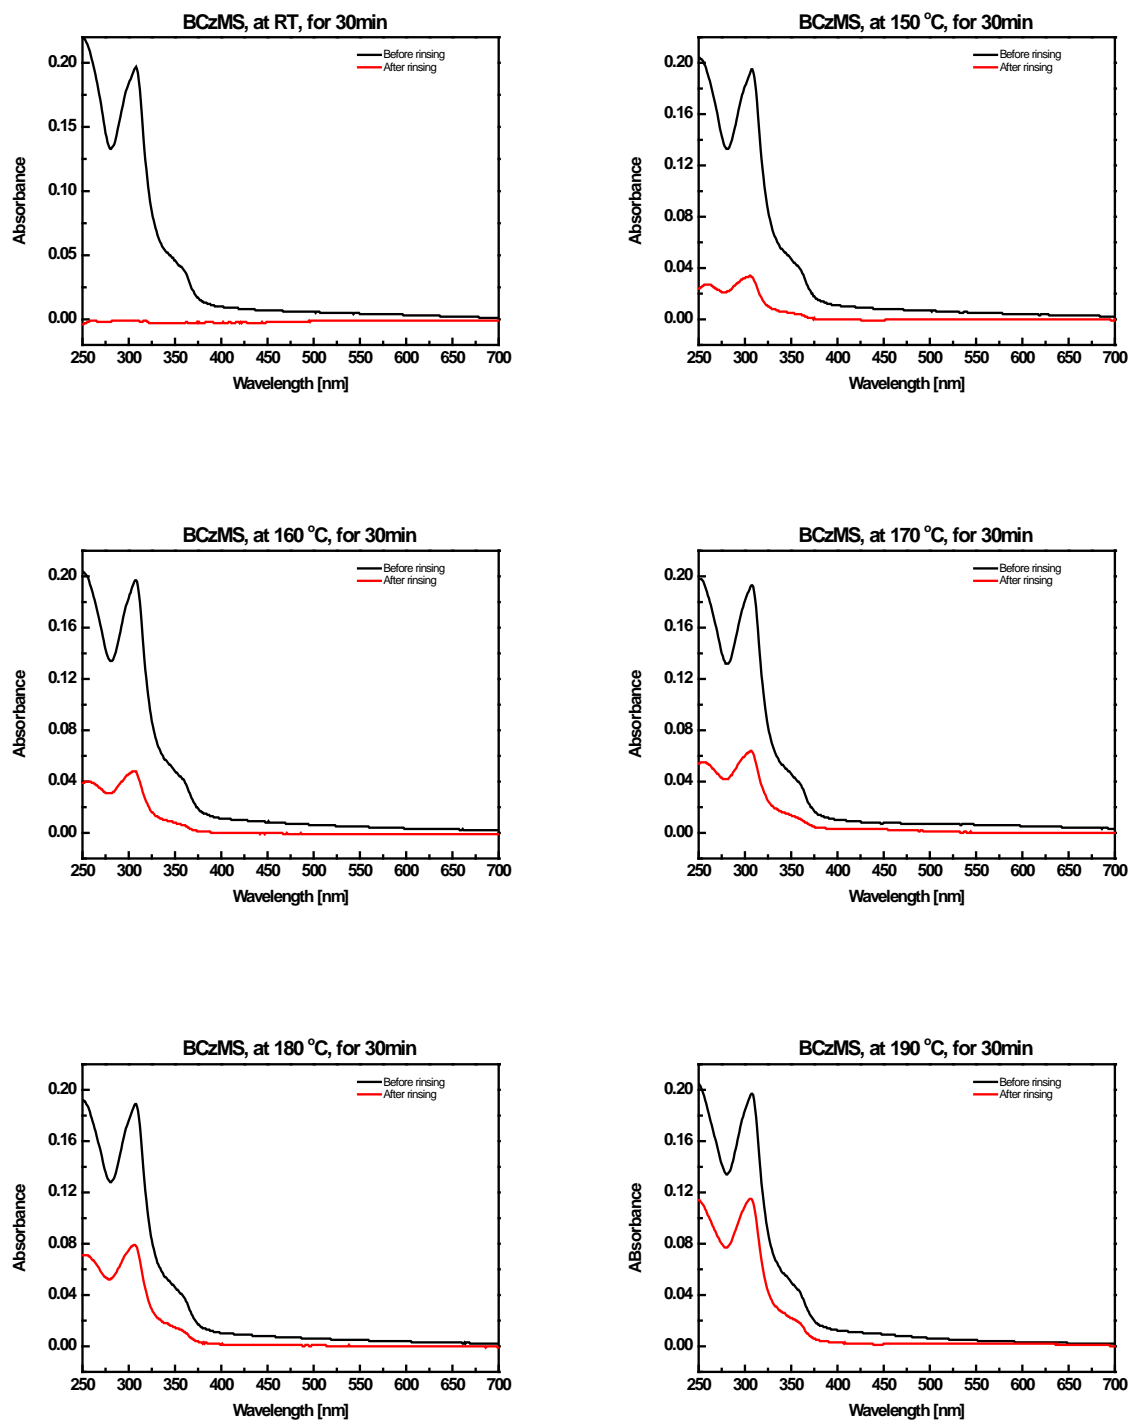

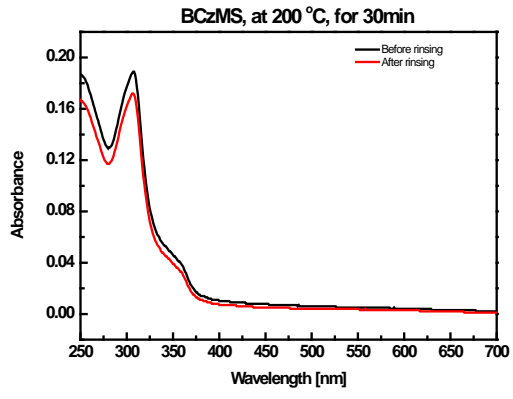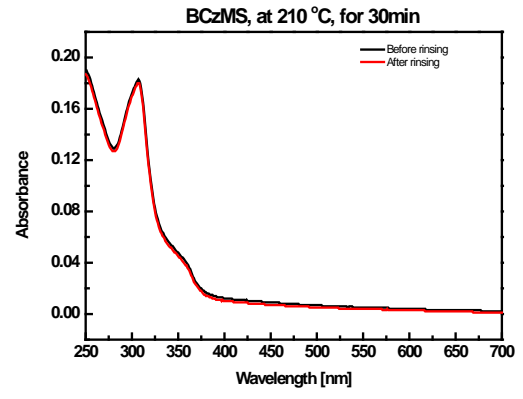

**Fig. S7** UV-Vis. absorption spectra of thermally cross-linked **BCzBOS** films before and after solvent rinsing with different thermal curing temperatures.

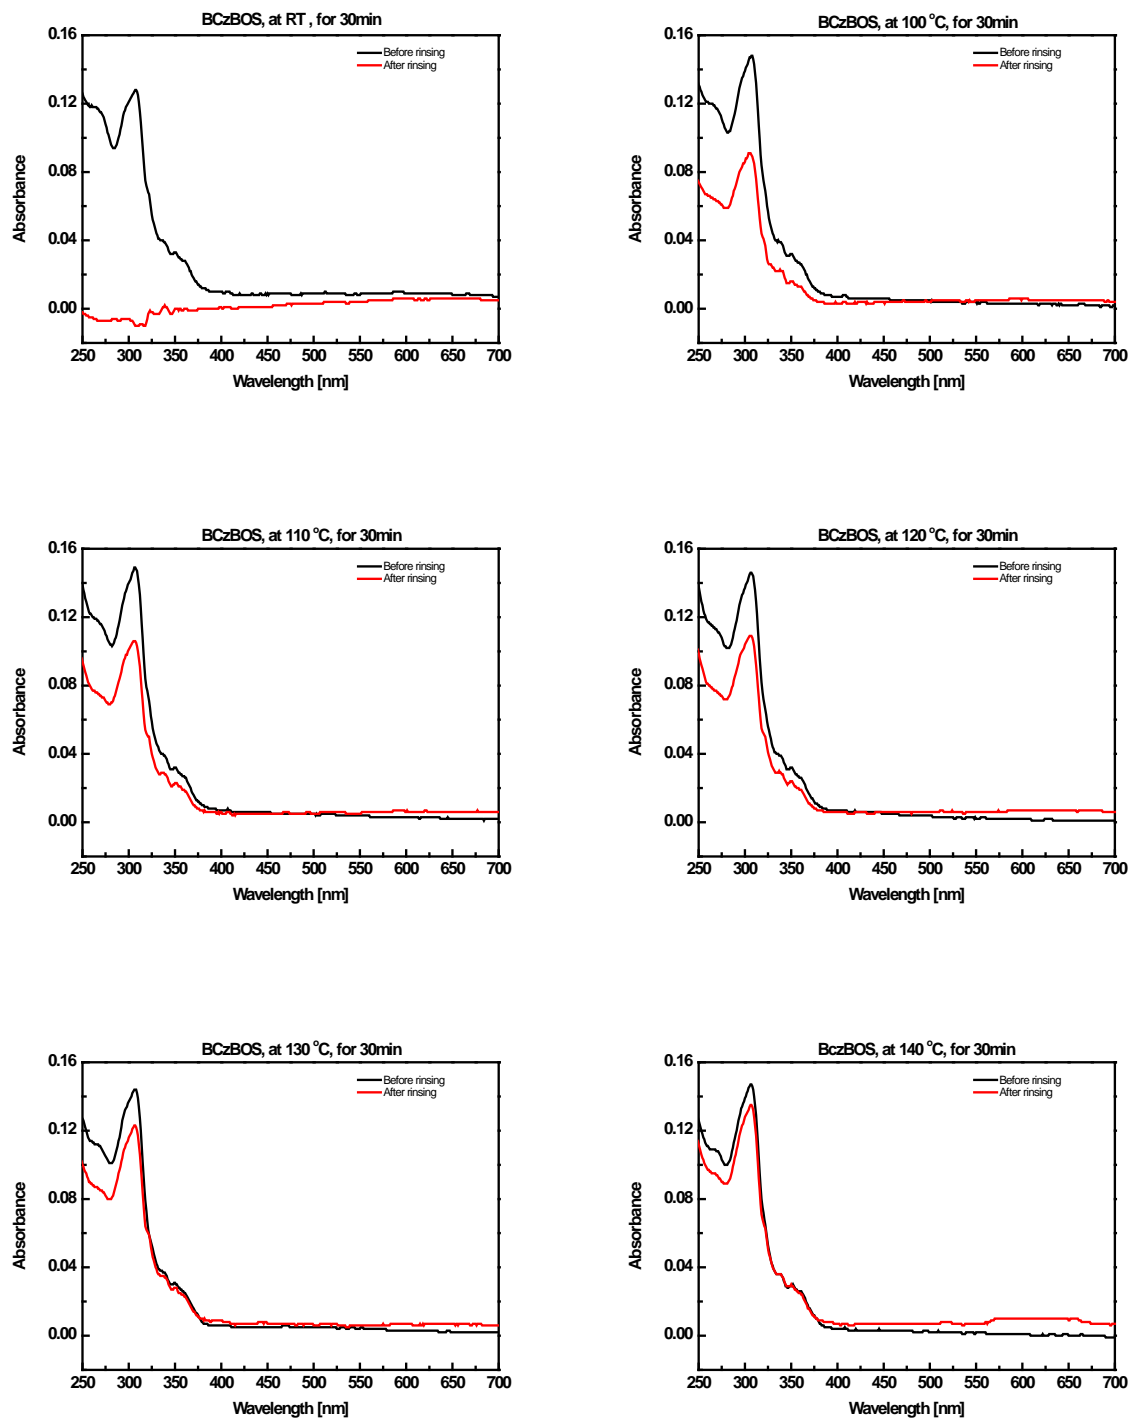

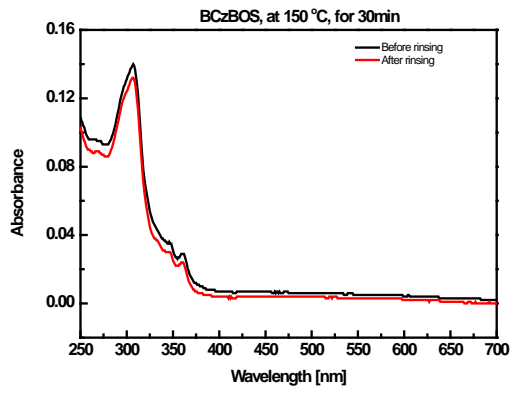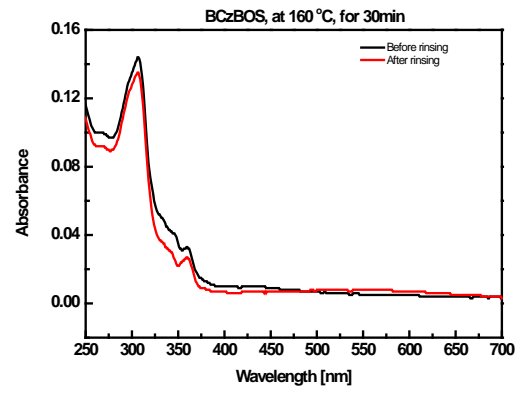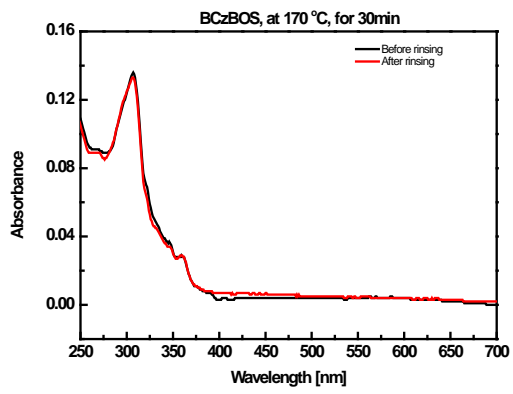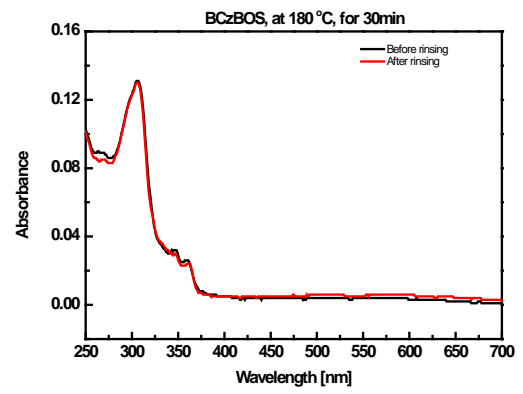

**Fig. S8** UV-Vis. absorption spectra of thermally cross-linked **MeO-BCzBOS** films before and after solvent rinsing with different thermal curing temperatures.

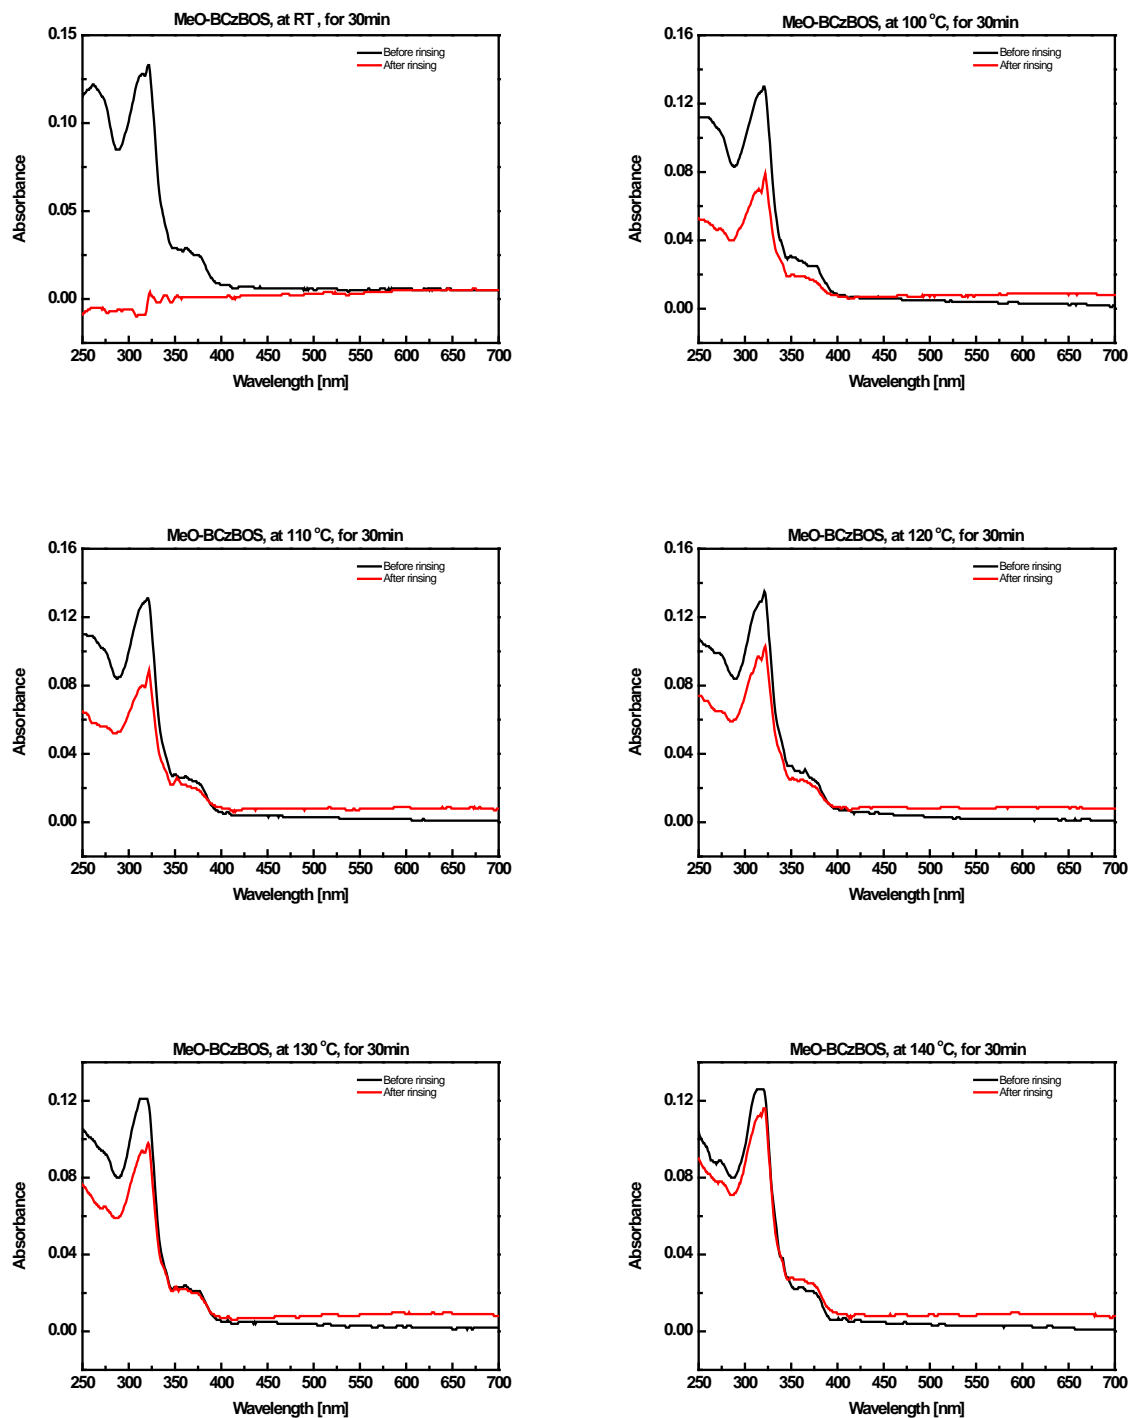

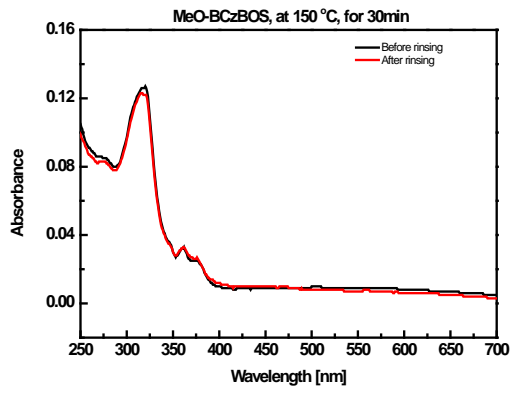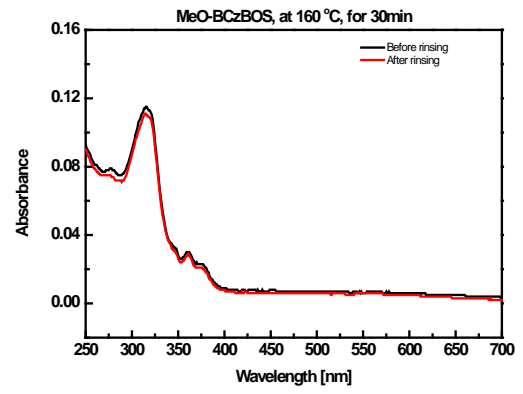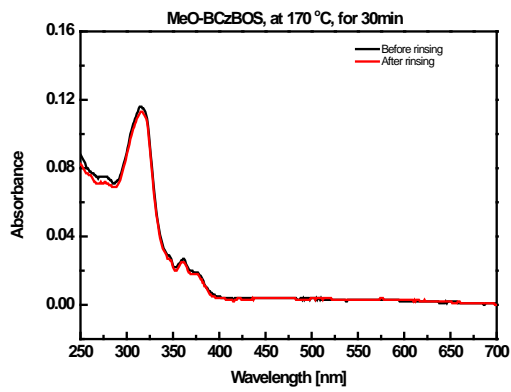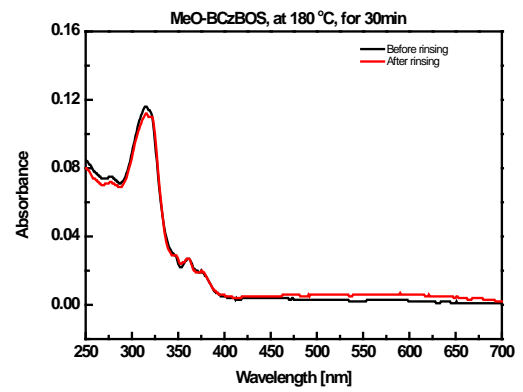



Fig. S9 Electroluminescence spectra of the HTL-containing OLED devices.

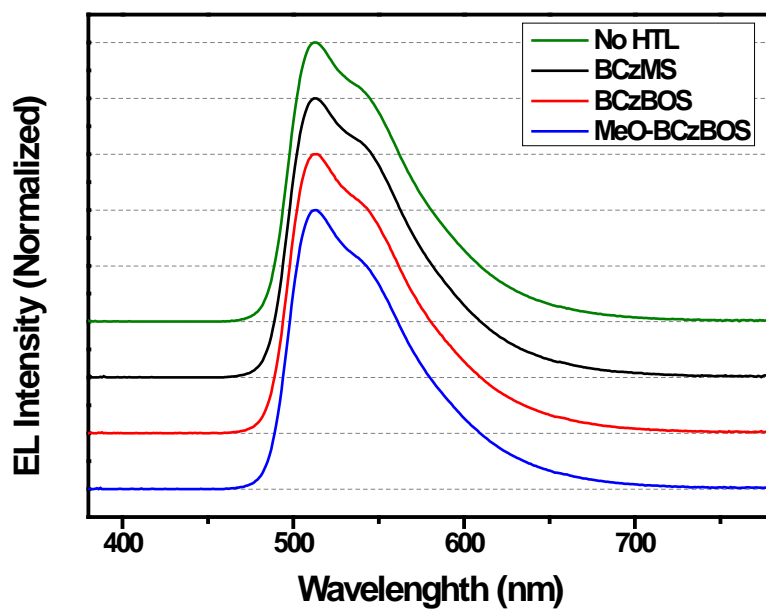

**Fig. S10** Luminance-Voltage characteristics of OLEDs by changing the thermal curing temperatures of (a) **BCzBOS** and (b) **BCzMS**.

(a)

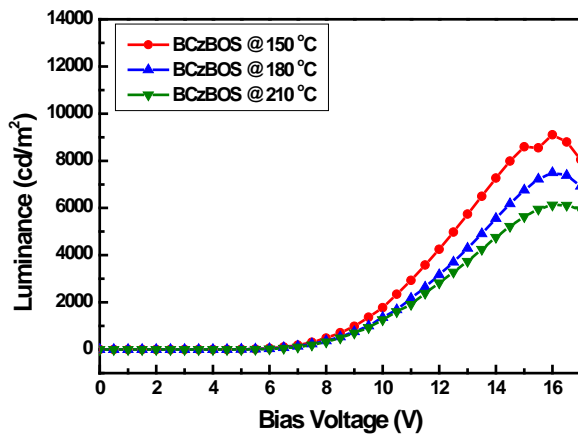

(b)

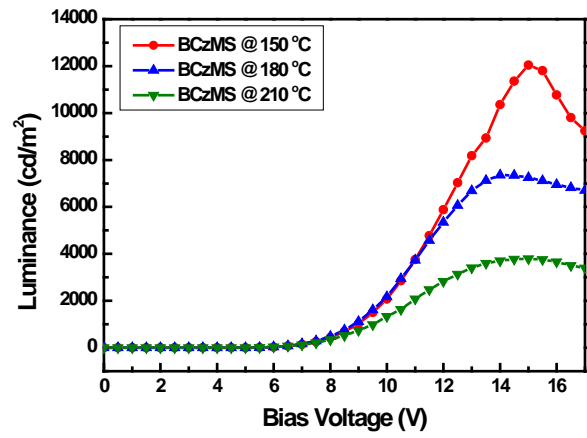

**Fig. S11** Optical microscope images of the (a) **BCzBOS** and (b) **MeO-BCzBOS** HTL films.

(a)

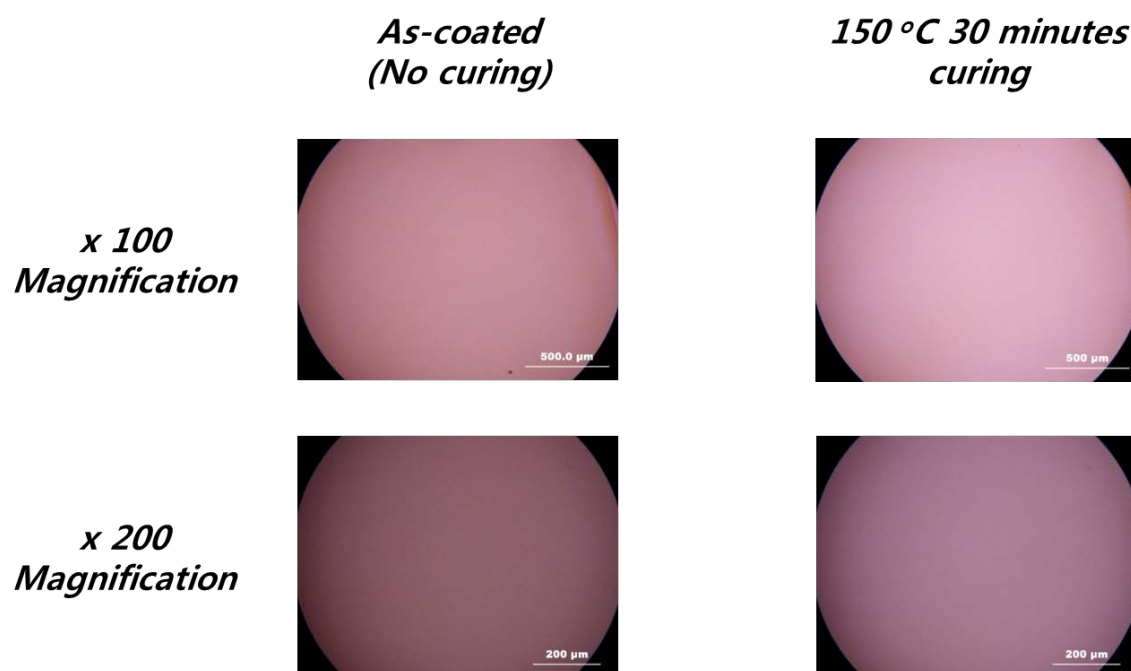

(b)

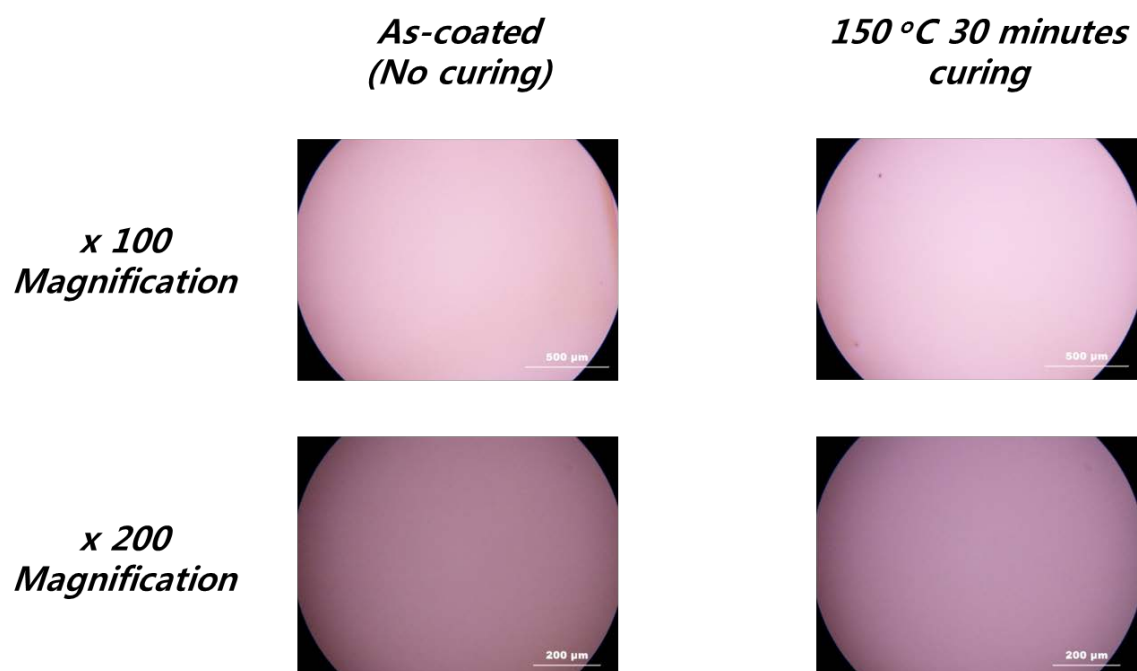

Fig. S12 AFM analysis results of the HTL films.

|               | Before curing                                                                                                     | After curing                                                                                                        | After washing                                                                                                       |
|---------------|-------------------------------------------------------------------------------------------------------------------|---------------------------------------------------------------------------------------------------------------------|---------------------------------------------------------------------------------------------------------------------|
| <b>BCzMS</b>  | 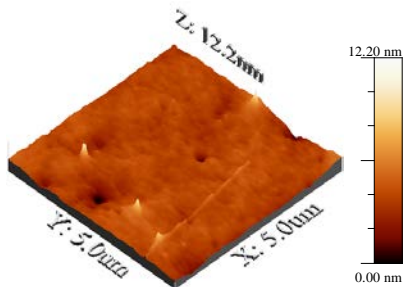 <p>RMS roughness : 0.62 nm</p>  |  <p>RMS roughness : 0.56 nm</p>  |  <p>RMS roughness : 0.75 nm</p>  |
| <b>BCzBOS</b> |  <p>RMS roughness : 0.40 nm</p> |  <p>RMS roughness : 0.49 nm</p> |  <p>RMS roughness : 0.52 nm</p> |

MeO-BCzBOS

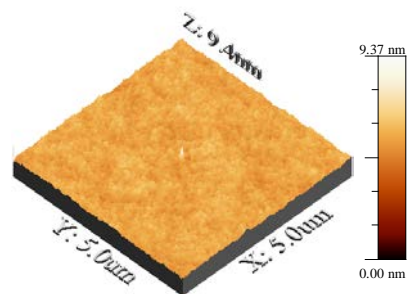

RMS roughness : 0.34 nm

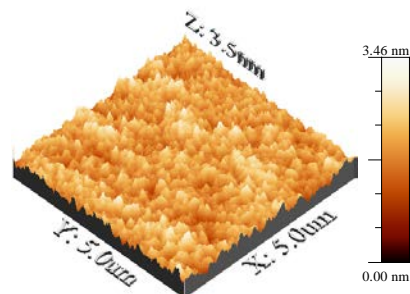

RMS roughness : 0.36 nm

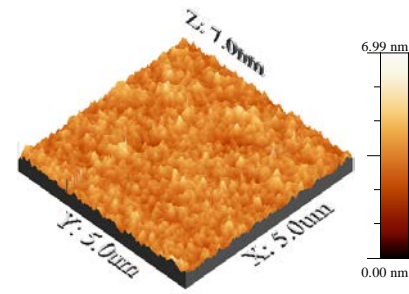

RMS roughness : 0.50 nm

Fig. S13 External quantum efficiency graph of the HTL-containing OLED devices.

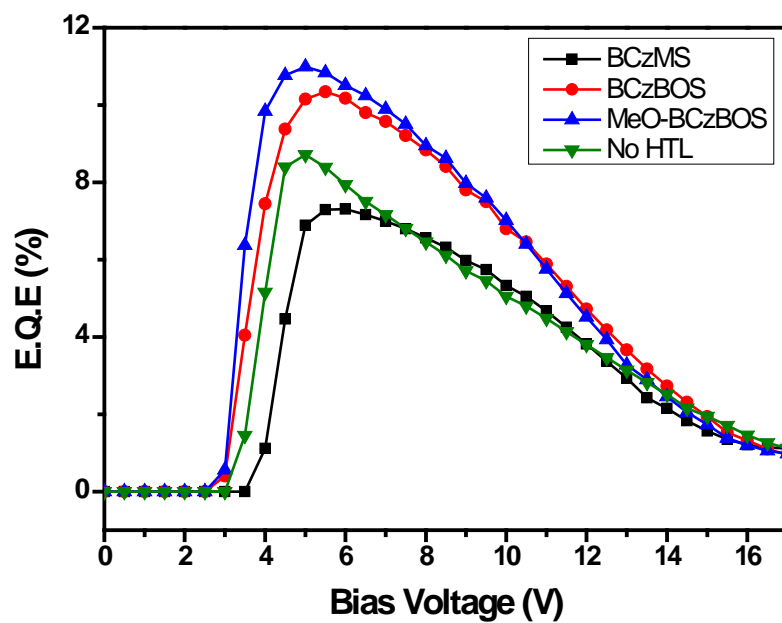

Fig. S14 Energy levels diagram for the devices.

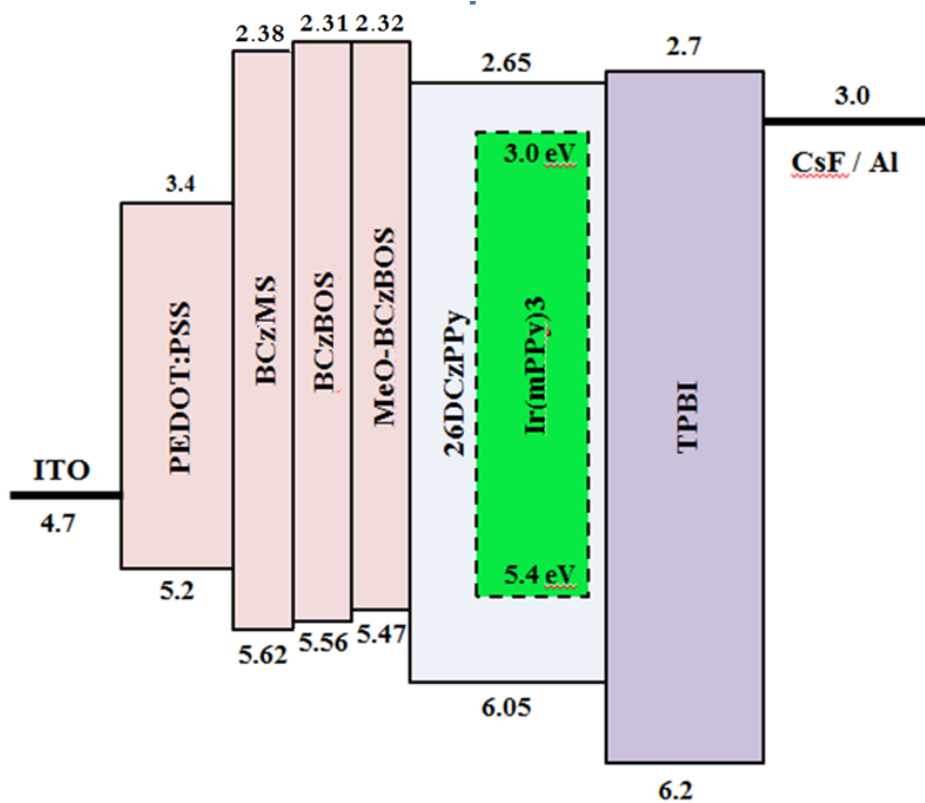

Supplement: c6ra01966h1.pdf [file c6ra01966h1.pdf]
